# Supplementary material for: Optimisation of Biomass Production and Nutritional Value of Two Marine Diatoms (Bacillariophyceae), Skeletonema costatum and Chaetoceros calcitrans
Source: MDPI journal article supplement (doi:10.3390/biology11040594), 2022-04-14
Supplement: s1 [file s1]

**Table S1:** Supplementary table to figure 1. *S. costatum* growth performance in terms of biomass dry weight (g L<sup>-1</sup>) obtained in 1-L bubble column PBRs in order to optimize the supply of a specific nutrient (silicate, nitrate, phosphate, iron) or micronutrient concentrations ( $n=3$ ). Values are represented as mean  $\pm$  standard deviation.

| <b>Silicate trial (g L<sup>-1</sup> DW)</b>        |                              |                              |                              |                              |
|----------------------------------------------------|------------------------------|------------------------------|------------------------------|------------------------------|
| <b>Days</b>                                        | <b>0.4 mM</b>                | <b>0.8 mM</b>                | <b>1.2 mM</b>                | <b>2.4 mM</b>                |
| <b>0</b>                                           | 0.16 $\pm$ 0.00              | 0.18 $\pm$ 0.00              | 0.18 $\pm$ 0.00              | 0.16 $\pm$ 0.00              |
| <b>1</b>                                           | 0.44 $\pm$ 0.02              | 0.49 $\pm$ 0.02              | 0.47 $\pm$ 0.02              | 0.49 $\pm$ 0.01              |
| <b>3</b>                                           | 0.86 $\pm$ 0.04              | 1.61 $\pm$ 0.11              | 1.72 $\pm$ 0.07              | 1.77 $\pm$ 0.01              |
| <b>4</b>                                           | 1.24 $\pm$ 0.09              | 2.04 $\pm$ 0.06              | 2.08 $\pm$ 0.14              | 2.32 $\pm$ 0.09              |
| <b>6</b>                                           | 1.86 $\pm$ 0.11              | 2.73 $\pm$ 0.13              | 2.55 $\pm$ 0.06              | 3.07 $\pm$ 0.13              |
| <b>7</b>                                           | 2.02 $\pm$ 0.03              | 3.09 $\pm$ 0.22              | 3.04 $\pm$ 0.01              | 3.52 $\pm$ 0.17              |
| <b>Nitrate trial (g L<sup>-1</sup> DW)</b>         |                              |                              |                              |                              |
| <b>Days</b>                                        | <b>1 mM</b>                  | <b>2 mM</b>                  | <b>4 mM</b>                  | <b>8 mM</b>                  |
| <b>0</b>                                           | 0.19 $\pm$ 0.00              | 0.18 $\pm$ 0.00              | 0.18 $\pm$ 0.00              | 0.18 $\pm$ 0.00              |
| <b>1</b>                                           | 0.43 $\pm$ 0.01              | 0.42 $\pm$ 0.01              | 0.43 $\pm$ 0.01              | 0.42 $\pm$ 0.01              |
| <b>3</b>                                           | 1.21 $\pm$ 0.03              | 1.65 $\pm$ 0.00              | 1.64 $\pm$ 0.08              | 1.71 $\pm$ 0.09              |
| <b>4</b>                                           | 1.16 $\pm$ 0.06              | 1.63 $\pm$ 0.04              | 2.41 $\pm$ 0.11              | 2.54 $\pm$ 0.10              |
| <b>7</b>                                           | 1.53 $\pm$ 0.09              | 2.20 $\pm$ 0.18              | 3.18 $\pm$ 0.07              | 3.38 $\pm$ 0.14              |
| <b>Phosphate trial (g L<sup>-1</sup> DW)</b>       |                              |                              |                              |                              |
| <b>Days</b>                                        | <b>50 <math>\mu</math>M</b>  | <b>100 <math>\mu</math>M</b> | <b>200 <math>\mu</math>M</b> | <b>400 <math>\mu</math>M</b> |
| <b>0</b>                                           | 0.18 $\pm$ 0.00              | 0.18 $\pm$ 0.00              | 0.18 $\pm$ 0.00              | 0.18 $\pm$ 0.00              |
| <b>1</b>                                           | 0.47 $\pm$ 0.01              | 0.45 $\pm$ 0.01              | 0.45 $\pm$ 0.00              | 0.44 $\pm$ 0.03              |
| <b>3</b>                                           | 1.48 $\pm$ 0.04              | 1.54 $\pm$ 0.12              | 1.35 $\pm$ 0.06              | 1.18 $\pm$ 0.05              |
| <b>4</b>                                           | 2.89 $\pm$ 0.07              | 2.94 $\pm$ 0.03              | 2.65 $\pm$ 0.07              | 2.47 $\pm$ 0.11              |
| <b>7</b>                                           | 3.45 $\pm$ 0.20              | 3.72 $\pm$ 0.07              | 3.38 $\pm$ 0.25              | 3.52 $\pm$ 0.10              |
| <b>Iron trial (g L<sup>-1</sup> DW)</b>            |                              |                              |                              |                              |
| <b>Days</b>                                        | <b>1 mM</b>                  | <b>2 mM</b>                  | <b>4 mM</b>                  | <b>8 mM</b>                  |
| <b>0</b>                                           | 0.16 $\pm$ 0.00              | 0.18 $\pm$ 0.00              | 0.18 $\pm$ 0.00              | 0.18 $\pm$ 0.00              |
| <b>1</b>                                           | 0.44 $\pm$ 0.01              | 0.44 $\pm$ 0.02              | 0.42 $\pm$ 0.01              | 0.43 $\pm$ 0.02              |
| <b>3</b>                                           | 1.92 $\pm$ 0.01              | 1.89 $\pm$ 0.01              | 1.69 $\pm$ 0.15              | 1.69 $\pm$ 0.17              |
| <b>4</b>                                           | 2.54 $\pm$ 0.09              | 2.59 $\pm$ 0.06              | 2.31 $\pm$ 0.12              | 2.45 $\pm$ 0.19              |
| <b>7</b>                                           | 2.49 $\pm$ 0.12              | 2.56 $\pm$ 0.10              | 2.26 $\pm$ 0.20              | 2.40 $\pm$ 0.08              |
| <b>Micronutrient's trial (g L<sup>-1</sup> DW)</b> |                              |                              |                              |                              |
| <b>Days</b>                                        | <b>0.5 mL L<sup>-1</sup></b> | <b>1 mL L<sup>-1</sup></b>   | <b>2 mL L<sup>-1</sup></b>   | <b>4 mL L<sup>-1</sup></b>   |
| <b>0</b>                                           | 0.19 $\pm$ 0.00              | 0.19 $\pm$ 0.00              | 0.19 $\pm$ 0.00              | 0.19 $\pm$ 0.00              |
| <b>1</b>                                           | 0.50 $\pm$ 0.00              | 0.50 $\pm$ 0.01              | 0.50 $\pm$ 0.01              | 0.50 $\pm$ 0.00              |
| <b>3</b>                                           | 1.88 $\pm$ 0.05              | 1.84 $\pm$ 0.03              | 1.68 $\pm$ 0.07              | 1.87 $\pm$ 0.00              |
| <b>4</b>                                           | 2.54 $\pm$ 0.00              | 2.51 $\pm$ 0.02              | 2.34 $\pm$ 0.13              | 2.48 $\pm$ 0.02              |
| <b>7</b>                                           | 3.09 $\pm$ 0.10              | 3.05 $\pm$ 0.05              | 2.86 $\pm$ 0.10              | 3.09 $\pm$ 0.07              |

**Table S2:** Supplementary table to figure 2. *C. calcitrans* growth performance in terms of biomass dry weight (g L<sup>-1</sup>) obtained in 1-L bubble column PBRs in order to optimize the supply of a specific nutrient (silicate, nitrate, phosphate, iron) or micronutrient concentrations (*n*=3). Values are represented as mean ± standard deviation.

| <b>Silicate trial (g L<sup>-1</sup> DW)</b>       |                        |                      |                      |                      |
|---------------------------------------------------|------------------------|----------------------|----------------------|----------------------|
| <b>Days</b>                                       | 0.4 mM                 | 0.8 mM               | 1.2 mM               | 2.4 mM               |
| <b>0</b>                                          | 0.12 ± 0.00            | 0.12 ± 0.00          | 0.12 ± 0.00          | 0.12 ± 0.00          |
| <b>1</b>                                          | 0.39 ± 0.01            | 0.41 ± 0.00          | 0.41 ± 0.01          | 0.42 ± 0.01          |
| <b>3</b>                                          | 0.67 ± 0.02            | 0.89 ± 0.03          | 0.95 ± 0.03          | 1.00 ± 0.03          |
| <b>5</b>                                          | 0.68 ± 0.01            | 1.56 ± 0.02          | 1.64 ± 0.01          | 1.77 ± 0.05          |
| <b>7</b>                                          | 0.76 ± 0.03            | 1.61 ± 0.03          | 2.03 ± 0.06          | 2.05 ± 0.08          |
| <b>Nitrate trial (g L<sup>-1</sup> DW)</b>        |                        |                      |                      |                      |
| <b>Days</b>                                       | 1 mM                   | 2 mM                 | 4 mM                 | 8 mM                 |
| <b>0</b>                                          | 0.12 ± 0.00            | 0.12 ± 0.00          | 0.12 ± 0.00          | 0.12 ± 0.00          |
| <b>1</b>                                          | 0.29 ± 0.00            | 0.30 ± 0.00          | 0.29 ± 0.00          | 0.29 ± 0.00          |
| <b>3</b>                                          | 0.46 ± 0.01            | 0.97 ± 0.01          | 0.95 ± 0.00          | 0.92 ± 0.07          |
| <b>5</b>                                          | 0.55 ± 0.05            | 1.20 ± 0.05          | 1.60 ± 0.04          | 1.53 ± 0.07          |
| <b>7</b>                                          | 0.73 ± 0.03            | 1.13 ± 0.02          | 2.17 ± 0.02          | 2.03 ± 0.02          |
| <b>Phosphate trial (g L<sup>-1</sup> DW)</b>      |                        |                      |                      |                      |
| <b>Days</b>                                       | 50 µM                  | 100 µM               | 200 µM               | 400 µM               |
| <b>0</b>                                          | 0.04 ± 0.00            | 0.04 ± 0.00          | 0.04 ± 0.00          | 0.04 ± 0.00          |
| <b>1</b>                                          | 0.30 ± 0.00            | 0.30 ± 0.01          | 0.29 ± 0.00          | 0.25 ± 0.00          |
| <b>3</b>                                          | 1.12 ± 0.04            | 1.20 ± 0.05          | 1.08 ± 0.06          | 1.01 ± 0.09          |
| <b>5</b>                                          | 1.53 ± 0.02            | 1.68 ± 0.01          | 1.62 ± 0.05          | 1.53 ± 0.09          |
| <b>7</b>                                          | 2.32 ± 0.05            | 2.44 ± 0.02          | 2.31 ± 0.06          | 2.19 ± 0.08          |
| <b>Iron trial (g L<sup>-1</sup> DW)</b>           |                        |                      |                      |                      |
| <b>Days</b>                                       | 10 µM                  | 20 µM                | 40 µM                | 80 µM                |
| <b>0</b>                                          | 0.11 ± 0.00            | 0.12 ± 0.00          | 0.12 ± 0.00          | 0.12 ± 0.00          |
| <b>1</b>                                          | 0.29 ± 0.00            | 0.30 ± 0.00          | 0.30 ± 0.00          | 0.31 ± 0.00          |
| <b>3</b>                                          | 1.05 ± 0.01            | 1.04 ± 0.03          | 1.01 ± 0.02          | 1.03 ± 0.01          |
| <b>5</b>                                          | 1.39 ± 0.02            | 1.45 ± 0.02          | 1.62 ± 0.02          | 1.61 ± 0.03          |
| <b>7</b>                                          | 1.66 ± 0.06            | 1.76 ± 0.02          | 1.93 ± 0.06          | 2.09 ± 0.02          |
| <b>Micronutrients trial (g L<sup>-1</sup> DW)</b> |                        |                      |                      |                      |
| <b>Days</b>                                       | 0.5 mL L <sup>-1</sup> | 1 mL L <sup>-1</sup> | 2 mL L <sup>-1</sup> | 4 mL L <sup>-1</sup> |
| <b>0</b>                                          | 0.12 ± 0.00            | 0.12 ± 0.00          | 0.12 ± 0.00          | 0.12 ± 0.00          |
| <b>1</b>                                          | 0.30 ± 0.00            | 0.36 ± 0.00          | 0.36 ± 0.00          | 0.36 ± 0.00          |
| <b>3</b>                                          | 1.19 ± 0.07            | 1.14 ± 0.03          | 1.32 ± 0.03          | 1.22 ± 0.04          |
| <b>5</b>                                          | 1.78 ± 0.01            | 1.75 ± 0.05          | 1.80 ± 0.05          | 1.75 ± 0.06          |
| <b>7</b>                                          | 1.99 ± 0.05            | 1.96 ± 0.00          | 1.95 ± 0.06          | 1.92 ± 0.16          |
